# Supplementary material for: Effect of 8-week oral supplementation with 3-µg cyano-B12 or hydroxo-B12 in a vitamin B12-deficient population
Source: PubMed Central journal article supplement (PMC6424936; doi:10.1007/s00394-017-1590-0), 2017-12-05
Supplement: 394_2017_1590_MOESM1_ESM.pdf [file 394_2017_1590_MOESM1_ESM.pdf]

## ELECTRONIC SUPPLEMENTARY MATERIAL

### Effect of eight weeks' oral supplementation with 3- $\mu$ g cyano-B12 or hydroxo-B12 in a vitamin B12-deficient population

European Journal of Nutrition (EJON)

Eva Greibe<sup>1\*</sup>, Namita Mahalle<sup>2</sup>, Vijayshri Bhide<sup>2</sup>, Sergey Fedosov<sup>3</sup>, Christian W. Heegaard<sup>3</sup>, Sadanand Naik<sup>2\*</sup>, Ebba Nexo<sup>1</sup>

<sup>1</sup>Department of Clinical Biochemistry and Institute of Clinical Medicine, Aarhus University Hospital, Aarhus, Denmark (EG, EN); <sup>2</sup>Department of Pathology, Deenanath Mangeshkar Hospital and Research Center, Pune, India (NM, VB, SN); <sup>3</sup>Department of Molecular Biology and Genetics, Aarhus University, Aarhus, Denmark (SF, CWH).

\*Address correspondence and reprint requests to Eva Greibe, Department of Clinical Biochemistry, Aarhus University Hospital, Aarhus, Denmark. Phone: +45 26 39 10 09. Email: [greibe@clin.au.dk](mailto:greibe@clin.au.dk)

## ONLINE RESOURCES 1

### Data fitting and comparison of the treatment models.

Changes in total serum Cbl ( $\Delta\text{Cbl} = \text{Cbl} - \text{Cbl}_0$ ) and holoTC ( $\Delta\text{holoTC} = \text{holoTC} - \text{holoTC}_0$ ) from the respective baselines ( $X_0$ ) were calculated for each patient (Fig. 2). The data were plotted over time as three datasets (CN-group, HO-group, and placebo group), and the points for each group were fitted using an exponential function:

$$y = A_1 + A_2 \cdot (1 - e^{-A_3 \cdot t}) \quad \text{Eq. 1}$$

where  $y$  is the dependent variable (either  $\Delta\text{Cbl}$  or  $\Delta\text{holoTC}$ );  $A_1$  is the baseline value;  $A_2$  is the maximal amplitude of change;  $A_3$  is the rate constant of change;  $t$  corresponds to the time of

treatment (independent variable). The fitting procedure included three parameters: fixed  $A_1 = 0$  and floating  $A_2$  and  $A_3$ . The fixed zero parameter  $A_1$  was retained in Eq. 1 (and the covariance matrix) because its error adds to the errors of  $A_2$  and  $A_3$  making their statistical estimates more realistic. The probability ( $p_i$ ) of zero value for each parameter  $A_i$  was assessed by t-test, and the overall probability of “zero” model ( $A_1 = A_2 = A_3 = 0$ ) was given as  $p_1 \cdot p_2 \cdot p_3 = p_2 \cdot p_3$  ( $p_1 = 1$  for the assigned  $A_1 = 0$ ). The parameters  $A_1, A_2, A_3$  of different groups were aligned and compared pairwise (e.g.  $A_{2,CN} \pm SE$  for CN-group vs.  $A_{2,HO} \pm SE$  for HO-group) and possible equality of the two values was assessed using t-test. The overall identity of the two models (e.g. CN-group vs. HO-group) was given as  $p_1 \cdot p_2 \cdot p_3$ .

Changes in MMA and Hcy over time were presented as ratios between the concentration at a given time point and the concentration at the baseline (e.g.  $MMA/MMA_0$ ). Difference from the baseline ( $\Delta MMA$  and  $\Delta Hcy$ ) could not be used because this value is proportional to the baseline concentration ( $MMA_0$  and  $Hcy_0$ ). At a limited concentration interval, the dependence on baseline can be compensated by division ( $X/X_0$ ). The ratios were plotted as three datasets (for CN-group, HO-group and placebo group) and fitted by a linear function. The choice was taken after the initially attempted fitting Eq.1, which gave the curves of a nearly linear shape (not shown). The used function was recorded as follows:

$$y = A_0 + A_1 \cdot t \quad \text{Eq. 2}$$

where  $y$  is the ratio (dependent variable);  $A_0$  is the baseline value (assigned as 1);  $A_1$  is the slope (floating parameter);  $t$  is the time. The approach to analysis of the fits was identical to the procedure for Eq. 1, expect for  $A_1 = 1$  for a “zero” model.

**Table S1.** Parameters of the fitting models (approximating relative responses to treatments with CN-B12, HO-B12, and placebo, Fig. 2).

| Marker response       | CN-B12 Treatment   | $p_i$ of $A_i = 0$ or 1                | HO-B12 treatment   | $p_i$ of $A_i = 0$ or 1               | placebo treatment | $p_i$ of $A_i = 0$ or 1               |
|-----------------------|--------------------|----------------------------------------|--------------------|---------------------------------------|-------------------|---------------------------------------|
| Cbl                   | Eq. 1              |                                        | Eq. 1              |                                       | Eq. 1             |                                       |
| $A_1 \pm SE, (p_1)$   | $0.0 \pm 6.0$      | (1)                                    | $0.0 \pm 5.8$      | (1)                                   | $0.0 \pm 3.0$     | (1)                                   |
| $A_2 \pm SE, (p_2)$   | $55.0 \pm 6.4$     | $(3 \cdot 10^{-14})$                   | $36.7 \pm 8.4$     | $(2 \cdot 10^{-5})$                   | $7.1 \pm 3.3$     | (0.035)                               |
| $A_3 \pm SE, (p_3)$   | $0.78 \pm 0.22$    | $(6 \cdot 10^{-4})$                    | $0.33 \pm 0.21$    | (0.11)                                | $0.53 \pm 0.64$   | (0.41)                                |
| $(p, \text{overall})$ |                    | <b><math>(2 \cdot 10^{-17})</math></b> |                    | <b><math>(2 \cdot 10^{-6})</math></b> |                   | <b>(0.014)</b>                        |
| holoTC                | Eq. 1              |                                        | Eq. 1              |                                       | Eq. 1             |                                       |
| $A_1 \pm SE, (p_1)$   | $0.0 \pm 1.4$      | (1.0)                                  | $0.0 \pm 1.4$      | (1.0)                                 | $0.0 \pm 0.7$     | (1.0)                                 |
| $A_2 \pm SE, (p_2)$   | $4.9 \pm 1.5$      | (0.0011)                               | $4.0 \pm 1.5$      | (0.011)                               | $-1.2 \pm 0.75$   | (0.14)                                |
| $A_3 \pm SE, (p_3)$   | $2.1 \pm 2.3$      | (0.38)                                 | $0.50 \pm 2.3$     | (0.32)                                | $2 \pm 5$         | (0.69)                                |
| $(p, \text{overall})$ |                    | <b>(0.0042)</b>                        |                    | <b>(0.0036)</b>                       |                   | (0.10)                                |
| MMA                   | Eq. 2              |                                        | Eq. 2              |                                       | Eq. 2             |                                       |
| $A_1 \pm SE, (p_1)$   | $1.0 \pm 0.06$     | (1.0)                                  | $1.0 \pm 0.03$     | (1.0)                                 | $1.0 \pm 0.06$    | (1.0)                                 |
| $A_2 \pm SE, (p_2)$   | $-0.022 \pm 0.013$ | (0.082)                                | $-0.032 \pm 0.007$ | $(3 \cdot 10^{-5})$                   | $0.017 \pm 0.011$ | (0.16)                                |
| $(p, \text{overall})$ |                    | <u>(0.082)</u>                         |                    | <b><math>(3 \cdot 10^{-5})</math></b> |                   | (0.16)                                |
| Hcy                   | Eq. 2              |                                        | Eq. 2              |                                       | Eq. 2             |                                       |
| $A_1 \pm SE, (p_1)$   | $1.0 \pm 0.04$     | (1.0)                                  | $1.0 \pm 0.05$     | (1.0)                                 | $1.0 \pm 0.03$    | (1)                                   |
| $A_2 \pm SE, (p_2)$   | $-0.002 \pm 0.008$ | (0.82)                                 | $0.00 \pm 0.01$    | (0.96)                                | $0.023 \pm 0.006$ | $(6 \cdot 10^{-4})$                   |
| $(p, \text{overall})$ |                    | (0.82)                                 |                    | (0.96)                                |                   | <b><math>(6 \cdot 10^{-4})</math></b> |

**Table S2.** Probability of equal fitting models for CN-B12 vs. HO-B12 treatments and each treatment vs. placebo (Fig. 2).

| Marker               | <i>p</i> of<br>CN-B12 = HO-B12 | <i>p</i> of<br>CN-B12 = placebo        | <i>p</i> of<br>HO-B12 = placebo       |
|----------------------|--------------------------------|----------------------------------------|---------------------------------------|
| ΔCbl                 | <b>0.011</b>                   | <b><math>1.6 \cdot 10^{-10}</math></b> | <b><math>8.7 \cdot 10^{-4}</math></b> |
| ΔholoTC              | 0.34                           | <b><math>3.3 \cdot 10^{-4}</math></b>  | <b>0.0026</b>                         |
| MMA/MMA <sub>0</sub> | 0.54                           | <b>0.025</b>                           | <b><math>5.8 \cdot 10^{-4}</math></b> |
| Hcy/Hcy <sub>0</sub> | 0.86                           | <b>0.016</b>                           | <u>0.067</u>                          |
